# Supplementary material for: Mapping Land Cover Types for Highland Andean Ecosystems in Peru Using Google Earth Engine
Source: MDPI journal article supplement (doi:10.3390/rs14071562), 2022-03-24
Supplement: s1 [file s1]

# SUPPLEMENTARY MATERIALS

**Table S1.** Metadata for all utilized Landsat 8 images.

| #  | Landsat ID                               | SENSING_TIME                 | CLOUD COVER |
|----|------------------------------------------|------------------------------|-------------|
| 1  | LC08_L1TP_006068_20180420_20180502_01_T1 | 2018-04-20T15:04:01.8192279Z | 60.91       |
| 2  | LC08_L1TP_006068_20180607_20180615_01_T1 | 2018-06-07T15:03:34.2646420Z | 6.31        |
| 3  | LC08_L1TP_006068_20180522_20180605_01_T1 | 2018-05-22T15:03:41.4989700Z | 61.43       |
| 4  | LC08_L1TP_006068_20180623_20180704_01_T1 | 2018-06-23T15:03:45.3609760Z | 13.25       |
| 5  | LC08_L1TP_006069_20180215_20180307_01_T1 | 2018-02-15T15:04:58.5739070Z | 69.51       |
| 6  | LC08_L1TP_006069_20180303_20180319_01_T1 | 2018-03-03T15:04:51.1744390Z | 70.66       |
| 7  | LC08_L1TP_006069_20180319_20180403_01_T1 | 2018-03-19T15:04:42.5190170Z | 67.81       |
| 8  | LC08_L1TP_006069_20180404_20180417_01_T1 | 2018-04-04T15:04:35.3721250Z | 60.34       |
| 9  | LC08_L1TP_006069_20180420_20180502_01_T1 | 2018-04-20T15:04:25.7441549Z | 43.82       |
| 10 | LC08_L1TP_006069_20180506_20180517_01_T1 | 2018-05-06T15:04:16.9971200Z | 62.56       |
| 11 | LC08_L1TP_006069_20180522_20180605_01_T1 | 2018-05-22T15:04:05.4281330Z | 5.07        |
| 12 | LC08_L1TP_006069_20180607_20180615_01_T1 | 2018-06-07T15:03:58.1980410Z | 0.46        |
| 13 | LC08_L1TP_006069_20180623_20180704_01_T1 | 2018-06-23T15:04:09.2943749Z | 2.88        |
| 14 | LC08_L1TP_007068_20180206_20180221_01_T1 | 2018-02-06T15:10:48.3417380Z | 54.45       |
| 15 | LC08_L1TP_007068_20180222_20180308_01_T1 | 2018-02-22T15:10:42.5544200Z | 21.55       |
| 16 | LC08_L1TP_007068_20180310_20180320_01_T1 | 2018-03-10T15:10:33.9663839Z | 57.87       |
| 17 | LC08_L1TP_007068_20180326_20180404_01_T1 | 2018-03-26T15:10:26.6158150Z | 53.31       |
| 18 | LC08_L1TP_007068_20180411_20180417_01_T1 | 2018-04-11T15:10:18.3002330Z | 29.19       |
| 19 | LC08_L1TP_007068_20180427_20180502_01_T1 | 2018-04-27T15:10:09.1340430Z | 21.29       |
| 20 | LC08_L1TP_007068_20180513_20180517_01_T1 | 2018-05-13T15:09:59.2049570Z | 7.75        |
| 21 | LC08_L1TP_007068_20180529_20180605_01_T1 | 2018-05-29T15:09:46.4205769Z | 7.56        |
| 22 | LC08_L1TP_007068_20180614_20180703_01_T1 | 2018-06-14T15:09:50.2510530Z | 32.36       |
| 23 | LC08_L1TP_007069_20180206_20180221_01_T1 | 2018-02-06T15:11:12.2709010Z | 21.24       |
| 24 | LC08_L1TP_007069_20180222_20180308_01_T1 | 2018-02-22T15:11:06.4835820Z | 24.39       |
| 25 | LC08_L1TP_007069_20180310_20180320_01_T1 | 2018-03-10T15:10:57.8913109Z | 17.96       |
| 26 | LC08_L1TP_007069_20180326_20180404_01_T1 | 2018-03-26T15:10:50.5449780Z | 9.19        |
| 27 | LC08_L1TP_007069_20180411_20180417_01_T1 | 2018-04-11T15:10:42.2293960Z | 2.64        |
| 28 | LC08_L1TP_007069_20180427_20180502_01_T1 | 2018-04-27T15:10:33.0632060Z | 15.31       |
| 29 | LC08_L1TP_007069_20180513_20180517_01_T1 | 2018-05-13T15:10:23.1256480Z | 39.07       |
| 30 | LC08_L1TP_007069_20180529_20180605_01_T1 | 2018-05-29T15:10:10.3497400Z | 55.19       |
| 31 | LC08_L1TP_007069_20180614_20180703_01_T1 | 2018-06-14T15:10:14.1886880Z | 69.6        |

### Code S1. Google Earth Engine code

```
var rois = ee.FeatureCollection(train_p1);
var rois2 = ee.FeatureCollection(testing_p1);
var ALOSdsmDEM = ee.Image('JAXA/ALOS/AW3D30_V1_1');
var ALOSdm = ALOSdsmDEM.select('AVE').toDouble().clip(puna).rename("ELEVACION");
var SLOPE_F = ee.Terrain.slope(ALOSdm).toDouble().clip(puna).rename("PENDIENTE");
var ASPECT_F = ee.Terrain.aspect(ALOSdm).toDouble().rename("ASPECTO");
var SIN_ASPECT =
ASPECT_F.divide(180).multiply(Math.PI).sin().toDouble().rename("ASPECTO");
var IMGLandsat8 = ee.ImageCollection('LANDSAT/LC08/C01/T1_SR')
.filterDate('2018-01-31', '2018-06-30') //fechas disponibles ('2013-04-11' - actualidad)
.filterBounds(puna);
function maskLXsr(image){
  var cloudShadowBitMask = ee.Number(2).pow(3).int();
  var cloudsBitMask = ee.Number(2).pow(5).int();
  var qa = image.select('pixel_qa');
  var mask = qa.bitwiseAnd(cloudShadowBitMask).eq(0)
    .and(qa.bitwiseAnd(cloudsBitMask).eq(0));
  return image.updateMask(mask).divide(10000).clamp(1e-6, 1)
    .copyProperties(image, ["system:time_start"]);
}
var IXmask = IMGLandsat8.map(maskLXsr);
var Landsat8_NRG1 = ee.Image(IXmask.median());
var Landsat8a = Landsat8_NRG1.clip(puna)
  .select(['B2', 'B3', 'B4', 'B5', 'B6', 'B7'])
  .rename(['blue', 'green', 'red', 'nir', 'swir1', 'swir2'])
  .toDouble();
var Landsat8 = (Landsat8a.select('blue', 'green', 'red', 'nir', 'swir1', 'swir2')
  .divide((Landsat8a.select('blue', 'green', 'red', 'nir', 'swir1', 'swir2')
    .reduce(ee.Reducer.sum()).divide(ee.Number(6))))
  .multiply(ee.Number(100));

//NDVI
var addNDVI=function(imagen){
  var NIR='nir';
  var RED='red';
  var ndvi= imagen.normalizedDifference([NIR, RED]).rename('NDVI');
  return imagen.addBands(ndvi).select('NDVI');
}
var ndvi = addNDVI(Landsat8).select('NDVI').toDouble().rename("NDVI");
var NDVI_FIN = ndvi.clamp(-1, 1);
//print(NDVI_FIN,"NDVI_FIN")
//Map.addLayer(NDVI_FIN,{min: 0, max: 1},"ndvi");

// Normalized Difference Builtup Index (NDBI)  $NDBI = (SWIR1 - NIR) / (SWIR1 + NIR)$ 
var addNDBI=function(imagen){
  var NIR='nir';
  var SWIR1='swir1';
  var ndbi= imagen.normalizedDifference([SWIR1,NIR]).rename('NDBI');
  return imagen.addBands(ndbi).select('NDBI');
}
var NDBI = addNDBI(Landsat8).select('NDBI').toDouble().rename("NDBI");
```

```

var NDBI_FIN = NDBI.clamp(-1, 1);
//print(NDBI_FIN,"NDBI_FIN")
//Map.addLayer(NDBI_FIN,{min: 0, max: 1},"NDBI");

//Normalized BURN RATIO "(NIR - SWIR1) / (NIR + SWIR1)"
var addNBR=function(imagen){
    var NIR='nir';
    var SWIR1='swir1';
    var nbr= imagen.normalizedDifference([NIR, SWIR1]).rename('NBR');
    return imagen.addBands(nbr).select('NBR');};
var NBR = addNBR(Landsat8).select('NBR').toDouble().rename("NBR");
var NBR_FIN = NBR.clamp(-1, 1);
//print(NBR_FIN,"NBR_FIN")
//Map.addLayer(NBR_FIN,{min: 0, max: 1},"NBR");

// Normalized Difference Water Index (NDWI)  $NDWI = (Green - NIR) / (Green + NIR)$ 
var addNDWI=function(imagen){
    var NIR='nir';
    var GREEN='green';
    var ndwi= imagen.normalizedDifference([GREEN, NIR]).rename('NDWI');
    return imagen.addBands(ndwi).select('NDWI');};
var NDWI = addNDWI(Landsat8).select('NDWI').toDouble().rename("NDWI");
var NDWI_FIN = NDWI.clamp(-1, 1);
//print(NDWI_FIN,"NDWI_FIN")
//Map.addLayer(NDWI_FIN,{min: 0, max: 1},"NDWI");

// Modified Normalized Difference Water Index (mNDWI) or Normalized Difference Snow Index (NDSI)
// A common index for detecting water (mNDWI) or snow (NDSI), where  $mNDWI = NDSI = (Green - SWIR1) / (Green + SWIR1)$ .
var addNDSI=function(imagen){
    var GREEN='green';
    var SWIR1='swir1';
    var ndsi= imagen.normalizedDifference([GREEN, SWIR1]).rename('NDSI');
    return imagen.addBands(ndsi).select('NDSI');};
var NDSI = addNDSI(Landsat8).select('NDSI').toDouble().rename("NDSI");
var NDSI_FIN = NDSI.clamp(-1, 1);
//print(NDSI_FIN,"NDSI_FIN")
//Map.addLayer(NDSI_FIN,{min: 0, max: 1},"NDSI");

// MSAVI
var MSAVI = Landsat8.select('nir').multiply(2).add(1)
    .subtract(Landsat8.select('nir').multiply(2).add(1).pow(2)
        .subtract(Landsat8.select('nir').subtract(Landsat8.select('red')).multiply(8)).sqrt()
    ).divide(2)
var MSAVI_FIN = MSAVI.toDouble().rename("MSAVI");
//print(MSAVI_FIN,"MSAVI_FIN")
//Map.addLayer(MSAVI_FIN,{min: 0, max: 0.5},"MSAVI_FIN");

```

```

// Enhanced Vegetation Index (EVI)
//An "optimized" vegetation index designed to enhance the vegetation signal with improved
sensitivity
//in high biomass regions. Landsat EVI = 2.5 * (NIR – Red) / ( NIR + 6*Red – 7.5*Blue + 1).
var EVI1 = ((Landsat8.select('nir').subtract(Landsat8.select('red'))))
    .divide(Landsat8.select('nir').add(((Landsat8.select('red').multiply(6))
    .subtract(Landsat8.select('blue').multiply(7.5))).add(1))))).multiply(2.5)
var EVI = EVI1.toDouble().rename("EVI");
//print (EVI, 'EVI')
//Map.addLayer(EVI, {min: -1, max: 1}, 'EVI');

// Spectral Variability Vegetation Index (SVVI)
var SVV1a = Landsat8.select('blue','green','red','nir','swir1','swir2').reduce(ee.Reducer.stdDev());
var SVV1b = Landsat8.select('nir','swir1','swir2').reduce(ee.Reducer.stdDev());
var SVVI = SVV1a.subtract(SVV1b).rename("SVVI");

//var bands = ['blue','green','red','nir','swir1','swir2']
//var bands = ['NDVI','NDBI','NBR', 'NDWI','NDSI','MSAVI','EVI','SVVI'];
//var bands = ['blue','green','red','nir','swir1','swir2', 'NDVI','NDBI','NBR',
'NDWI','NDSI','MSAVI','EVI','SVVI']
//var bands = ['blue','green','red','nir','swir1','swir2','ELEVACION', 'PENDIENTE', 'ASPECTO'];
//var bands = ['NDVI','NDBI','NBR', 'NDWI','NDSI','MSAVI','EVI','SVVI', 'ELEVACION',
'PENDIENTE', 'ASPECTO'];
//var bands = ['blue','green','red','nir','swir1','swir2','NDVI','NDBI','NBR',
'NDWI','NDSI','MSAVI','EVI','SVVI','ELEVACION', 'PENDIENTE', 'ASPECTO'];
var predictors_base = Landsat8.addBands(NDVI_FIN).addBands(NDBI_FIN).addBands(NBR_FIN)
    .addBands(NDWI_FIN).addBands(NDSI_FIN).addBands(MSAVI_FIN)
    .addBands(EVI).addBands(SVVI)
    .addBands(ALOSDM).addBands(SLOPE_F).addBands(SIN_ASPECT);
var predictors = predictors_base.select(bands);
var trainingPartition = predictors.sampleRegions({
    collection: rois,
    properties: ['Clave'],
    scale: 30
});
var testingPartition = predictors.sampleRegions({
    collection: rois2,
    properties: ['Clave'],
    scale: 30
});
var classifiers = [ee.Classifier.libsvm(),
    ee.Classifier.minimumDistance(),
    ee.Classifier.smileCart(),
    ee.Classifier.smileGradientTreeBoost(100),
    ee.Classifier.smileNaiveBayes(),
    ee.Classifier.smileRandomForest(100)];

var classifier = ee.Classifier.smileRandomForest({numberOfTrees: 100,}).train({
    features: trainingPartition,
    classProperty: 'Clave',
    inputProperties: bands

```

```

});

var dict = classifier.explain();
var variable_importance = ee.Feature(null, ee.Dictionary(dict).get('importance'));
var chart =
ui.Chart.feature.byProperty(variable_importance)
.setChartType('ColumnChart')
.setOptions({
title: 'Random Forest Variable Importance',
legend: {position: 'none'},
hAxis: {title: 'Bands'},
vAxis: {title: 'Importance'}
});

var votes = ee.Image().clip(puna);
for(var i in classifiers) {
  votes = votes.addBands(predictors.classify(classifiers[i].train(trainingPartition,"Clave")))}
print(votes, "votes");
var votes1 = votes.select('classification_4').toDouble()
print(votes1, 'vot1')

*Export.image.toDrive({
  image: votes.select('classification','classification_1',
                    'classification_2', 'classification_3',
                    'classification_4', 'classification_5'),
  description: 'C1',
  scale: 30,
  folder : 'COVER_NYC',
  maxPixels: 8000000000,
  region: puna});

```
